# Supplementary material for: Do dogs form reputations of humans? No effect of age after indirect and direct experience in a food-giving situation
Source: Research Square preprint supplement (doi:10.21203/rs.3.rs-5930224/v1), 2025-04-30
Supplement: Supplementary file 1 [file 28a0e7507ab73329a703e069.pdf]

Supplementary Information (SI) for:

**Do dogs form reputations of humans? No effect of age after indirect and direct experience in a food-giving situation**

*Animal Cognition*

**Hoi-Lam Jim<sup>1,2,3\*</sup>, Kadisha Belfiore<sup>1</sup>, Eva B. Martinelli<sup>1</sup>, Mayte Martínez<sup>1,4</sup>, Friederike Range<sup>1</sup>, Sarah Marshall-Pescini<sup>1\*</sup>**

<sup>1</sup>Domestication Lab, Konrad Lorenz Institute of Ethology, Department of Interdisciplinary Life Sciences, University of Veterinary Medicine Vienna, Vienna, Austria

<sup>2</sup>Institute for the Future of Human Society, Kyoto University, Kyoto, Japan

<sup>3</sup>Japan Society for the Promotion of Science, Tokyo, Japan

<sup>4</sup>Department of Psychology, University of Michigan, Ann Arbor, MI, USA

\* Corresponding author

E-mail: hoi-lam.jim@outlook.com (HLJ)

E-mail: sarah.marshall@vetmeduni.ac.at (SMP)

**Table S1** Individual characteristics of dogs that participated in the study

| Name    | Sex | Breed                          | Age (years) | Age group | Condition group | First condition | Previous experience in other experiments |
|---------|-----|--------------------------------|-------------|-----------|-----------------|-----------------|------------------------------------------|
| Dunni   | F   | Miniature Pinscher             | 1           | Young     | Eavesdropping   | Eavesdropping   | Yes                                      |
| Gandalf | M   | Andalusian Hound               | 1           |           |                 | Eavesdropping   | Yes                                      |
| Crash   | M   | Australian Shepherd            | 2           |           |                 | Direct          | Yes                                      |
| Daytona | F   | Australian Shepherd            | 2           |           |                 | Direct          | No                                       |
| Holly   | F   | Rottweiler                     | 2           |           |                 | Direct          | No                                       |
| Ravenna | F   | American Staffordshire Terrier | 3           |           |                 | Eavesdropping   | Yes                                      |
| Ajani   | F   | Mixed breed                    | 4           | Adult     |                 | Eavesdropping   | Yes                                      |
| Cody    | M   | Siberian Husky                 | 4           |           |                 | Eavesdropping   | No                                       |
| Chivas  | M   | Siberian Husky                 | 5           |           |                 | Direct          | Yes                                      |
| Lilu    | F   | Mixed breed                    | 5           |           |                 | Eavesdropping   | No                                       |
| Lenny   | M   | Canarian Warren Hound          | 6           |           |                 | Eavesdropping   | Yes                                      |

|         |   |                  |    |        |         |               |     |
|---------|---|------------------|----|--------|---------|---------------|-----|
| Bailey  | F | Pitbull Terrier  | 7  |        |         | Direct        | Yes |
| Capper  | M | Andalusian Hound | 7  |        |         | Eavesdropping | Yes |
| Aaron   | M | Labrador         | 8  | Senior |         | Direct        | Yes |
| Helena  | F | Poodle           | 9  |        |         | Eavesdropping | Yes |
| Sally   | F | Mixed breed      | 9  |        |         | Direct        | No  |
| Snoopy1 | M | Shih Tzu         | 10 |        |         | Eavesdropping | No  |
| Amy     | F | Border Collie    | 11 |        |         | Direct        | Yes |
| Monty   | M | Border Collie    | 11 |        |         | Direct        | Yes |
| Snoopy2 | M | Beagle           | 12 |        |         | Direct        | Yes |
| Jazzie  | F | Labrador         | 1  | Young  | Control | Direct        | No  |
| Spaiky  | M | Cane Corso       | 1  |        |         | Direct        | No  |
| Franzi  | F | Rottweiler       | 2  |        |         | Direct        | Yes |
| Timo    | M | Mixed breed      | 2  |        |         | Control       | Yes |

|        |   |                                |   |        |  |         |     |
|--------|---|--------------------------------|---|--------|--|---------|-----|
| Zazu   | F | Miniature Pinscher             | 2 |        |  | Control | No  |
| Asha   | F | Rhodesian Ridgeback            | 4 | Adult  |  | Control | Yes |
| Sixtus | M | Petit Brabançon                | 4 |        |  | Control | Yes |
| Django | M | American Staffordshire Terrier | 5 |        |  | Direct  | Yes |
| Ellis  | F | Portuguese Water Dog           | 5 |        |  | Direct  | No  |
| Kiki   | F | Mixed breed                    | 6 |        |  | Direct  | Yes |
| Ozzy   | M | Labrador                       | 6 |        |  | Control | No  |
| Aidan  | M | Irish Setter                   | 6 |        |  | Direct  | Yes |
| Rusty  | M | Mixed breed                    | 7 |        |  | Control | No  |
| Lilly  | F | Miniature Pinscher             | 8 | Senior |  | Direct  | Yes |
| Alois  | M | Mixed breed                    | 9 |        |  | Direct  | Yes |
| Fiona  | F | Rhodesian Ridgeback            | 9 |        |  | Control | Yes |
| Shari  | F | Rottweiler                     | 9 |        |  | Direct  | No  |

|        |   |               |    |  |  |         |     |
|--------|---|---------------|----|--|--|---------|-----|
| Jolie  | F | Mixed breed   | 10 |  |  | Control | Yes |
| Mozart | M | Labrador      | 11 |  |  | Control | No  |
| Ultimo | M | Border Collie | 11 |  |  | Control | Yes |

**Table S2** Results of the binomial GLM predicting partner choice in the baseline

| Term                                  | Estimate | SE    | 95% CI |        | Model stability |        | $\chi^2$ | df | $p^1$             |
|---------------------------------------|----------|-------|--------|--------|-----------------|--------|----------|----|-------------------|
|                                       |          |       | Lower  | Upper  | Min             | Max    |          |    |                   |
| Intercept                             | 0.527    | 0.735 | -0.908 | 2.053  | 0.107           | 0.815  |          |    |                   |
| Condition (Experimental) <sup>2</sup> | -1.331   | 0.693 | 2.767  | -0.017 | -1.464          | -1.099 | 3.942    | 1  | .047 <sup>4</sup> |
| Age group (Adult) <sup>3</sup>        | -0.360   | 0.851 | -2.077 | 1.316  | -0.661          | -0.016 | 2.140    | 2  | .343              |
| Age group (Senior)                    | 0.791    | 0.868 | -0.895 | 2.566  | 0.452           | 1.094  |          |    |                   |

<sup>1</sup>Some  $p$  values are not indicated due to their limited interpretation

<sup>2</sup>Reference level for Condition = Control

<sup>3</sup>Reference level for Age group = Young

<sup>4</sup>Although this  $p$  value is significant, the full-null comparison was not. Therefore, the estimate should not be interpreted as significant but as a likely false positive due to multiple testing within the model

**Table S3** Results of the binomial GLMM predicting partner choice after the observation phase in the eavesdropping vs control condition

| Term                                       | Estimate | SE    | 95% CI |       | Model stability |        | $\chi^2$ | df | p <sup>1</sup> |
|--------------------------------------------|----------|-------|--------|-------|-----------------|--------|----------|----|----------------|
|                                            |          |       | Lower  | Upper | Min             | Max    |          |    |                |
| Intercept                                  | -0.931   | 0.603 | -0.183 | 0.211 | -1.176          | -0.651 |          |    |                |
| Condition (Experimental) <sup>2</sup>      | 0.007    | 0.491 | -0.960 | 0.975 | -0.148          | 0.143  | 0.000    | 1  | .989           |
| Age group (Adult) <sup>3</sup>             | 0.094    | 0.618 | -1.117 | 1.331 | -0.155          | 0.247  | 1.208    | 2  | .547           |
| Age group (Senior)                         | 0.627    | 0.635 | -0.603 | 1.912 | 0.399           | 0.777  |          |    |                |
| Trial (Trial 2) <sup>4</sup>               | 0.466    | 0.489 | -0.488 | 1.442 | 0.355           | 0.609  | 0.913    | 1  | .339           |
| z-transformed condition order <sup>5</sup> | -0.340   | 0.254 | -0.851 | 0.151 | -0.410          | -0.259 | 1.833    | 1  | .176           |
| <del>Condition*Age group<sup>6</sup></del> |          |       |        |       |                 |        | 0.135    | 2  | .935           |

<sup>1</sup>The *p* value of the intercept is not shown due to its limited interpretation

<sup>2</sup>Reference level for Condition = Control

<sup>3</sup>Reference level for Age group = Young

<sup>4</sup>Reference level for Trial = Trial 1

<sup>5</sup>z-transformed to a mean of 0 and a standard deviation of 1; original mean (*SD*): 1.500 (0.504)

<sup>6</sup>Removed from the model; the *p* value of the term at the time it was removed from the model is shown

**Table S4** Results of the beta GLMM predicting time spent in proximity to the generous partner after the observation phase in the eavesdropping vs control condition

| Term                                        | Estimate | SE    | 95% CI |       | Model stability |        | $\chi^2$ | df | <i>p</i> <sup>1</sup> |
|---------------------------------------------|----------|-------|--------|-------|-----------------|--------|----------|----|-----------------------|
|                                             |          |       | Lower  | Upper | Min             | Max    |          |    |                       |
| Intercept                                   | 0.387    | 0.359 | -0.328 | 1.091 | 0.257           | 0.488  |          |    |                       |
| Condition (Eavesdropping) <sup>2</sup>      | 0.024    | 0.311 | -0.587 | 0.635 | -0.054          | 0.090  | 0.006    | 1  | .937                  |
| Age group (Adult) <sup>3</sup>              | -0.050   | 0.384 | -0.806 | 0.706 | -0.168          | 0.100  | 2.906    | 2  | .234                  |
| Age group (Senior)                          | -0.603   | 0.397 | -1.387 | 0.178 | -0.751          | -0.472 |          |    |                       |
| Trial (Trial 2) <sup>4</sup>                | -0.127   | 0.310 | -0.738 | 0.483 | -0.230          | -0.038 | 0.169    | 1  | .681                  |
| z-transformed condition order <sup>5</sup>  | 0.039    | 0.158 | -0.273 | 0.350 | 0.011           | 0.085  | 0.059    | 1  | .807                  |
| <del>Condition*Age Group</del> <sup>6</sup> |          |       |        |       |                 |        | 1.110    | 2  | .574                  |

<sup>1</sup>Some *p* values are not indicated due to their limited interpretation. Significant *p* values are in bold

<sup>2</sup>Reference level for Condition = Control

<sup>3</sup>Reference level for Age group = Young

<sup>4</sup>z-transformed to a mean of 0 and a standard deviation of 1; original mean (*SD*): 1.506 (0.503)



**Table S5** Results of the binomial GLMM predicting partner choice after the experience phase in the direct experience condition

| Term                                                         | Estimate | SE    | 95% CI |       | Model stability |        | $\chi^2$ | df | p <sup>1</sup> |
|--------------------------------------------------------------|----------|-------|--------|-------|-----------------|--------|----------|----|----------------|
|                                                              |          |       | Lower  | Upper | Min             | Max    |          |    |                |
| Intercept                                                    | -0.040   | 0.214 | -0.477 | 0.393 | -0.167          | 0.108  |          |    |                |
| Age group (Adult) <sup>2</sup>                               | -0.040   | 0.285 | -0.620 | 0.537 | -0.196          | 0.096  | 0.565    | 2  | .972           |
| Age group (Senior)                                           | -0.068   | 0.288 | -0.655 | 0.512 | -0.207          | 0.066  |          |    |                |
| z-transformed trial number <sup>3</sup>                      | -0.042   | 0.097 | -0.232 | 0.148 | -0.071          | -0.009 | 0.185    | 1  | .667           |
| z-transformed condition order <sup>4</sup>                   | -0.039   | 0.115 | -0.272 | 0.194 | -0.083          | 0.004  | 0.117    | 1  | .732           |
| <del>z-transformed trial number*Age group</del> <sup>5</sup> |          |       |        |       |                 |        | 1.569    | 2  | .456           |

<sup>1</sup>The *p* value of the intercept is not shown due to its limited interpretation

<sup>2</sup>Reference level for Age group = Young

<sup>3</sup>z-transformed to a mean of 0 and a standard deviation of 1; original mean (*SD*): 6.477 (3.477)

<sup>4</sup>z-transformed to a mean of 0 and a standard deviation of 1; original mean (*SD*): 1.527 (0.500)

<sup>5</sup>Removed from the model; the *p* value of the term at the time it was removed from the model is shown

**Table S6** Results of the binomial GLMM predicting time spent with the generous partner after the experience phase in the direct experience condition

| Term                                                         | Estimate | SE    | 95% CI |       | Model stability |       | $\chi^2$ | df | p <sup>1</sup> |
|--------------------------------------------------------------|----------|-------|--------|-------|-----------------|-------|----------|----|----------------|
|                                                              |          |       | Lower  | Upper | Min             | Max   |          |    |                |
| Intercept                                                    | 0.276    | 0.136 | 0.007  | 0.556 | 0.225           | 0.312 |          |    |                |
| Age group (Adult) <sup>2</sup>                               | 0.146    | 0.179 | -0.217 | 0.507 | 0.075           | 0.245 | 0.663    | 2  | .718           |
| Age group (Senior)                                           | 0.097    | 0.181 | -0.270 | 0.461 | 0.015           | 0.182 |          |    |                |
| z-transformed trial number <sup>3</sup>                      | 0.043    | 0.069 | -0.094 | 0.179 | 0.025           | 0.059 | 0.376    | 1  | .540           |
| z-transformed condition order <sup>4</sup>                   | 0.260    | 0.073 | 0.114  | 0.410 | 0.220           | 0.294 | 11.210   | 1  | .001           |
| <del>z-transformed trial number*Age group</del> <sup>5</sup> |          |       |        |       |                 |       | 0.241    | 2  | .887           |

<sup>1</sup>The *p* value of the intercept is not shown due to its limited interpretation

<sup>2</sup>Reference level for Age group = Young

<sup>3</sup>z-transformed to a mean of 0 and a standard deviation of 1; original mean (*SD*): 6.258 (3.458)

<sup>4</sup>z-transformed to a mean of 0 and a standard deviation of 1; original mean (*SD*): 1.495 (0.501)

<sup>5</sup>Removed from the model; the *p* value of the term at the time it was removed from the model is shown

**Table S7** Results of the exact binomial tests for colour and side bias. Significant  $p$  values are in bold

| Subject | Number of trials | Colour bias                 |             | Side bias                  |             |
|---------|------------------|-----------------------------|-------------|----------------------------|-------------|
|         |                  | Number of successes (black) | $p$         | Number of successes (left) | $p$         |
| Aaron   | 12               | 6                           | 1           | 1                          | <b>.006</b> |
| Aidan   | 15               | 8                           | 1           | 7                          | 1           |
| Ajani   | 15               | 9                           | .607        | 6                          | .607        |
| Alois   | 12               | 6                           | 1           | 2                          | <b>.039</b> |
| Amy     | 12               | 11                          | <b>.006</b> | 8                          | .388        |
| Asha    | 15               | 8                           | 1           | 8                          | 1           |
| Bailey  | 15               | 5                           | .302        | 5                          | .302        |
| Capper  | 15               | 7                           | 1           | 6                          | .607        |
| Chivas  | 7                | 4                           | 1           | 1                          | .125        |
| Cody    | 14               | 4                           | .180        | 9                          | .424        |
| Crash   | 14               | 8                           | .791        | 3                          | .057        |

|         |    |    |             |    |                  |
|---------|----|----|-------------|----|------------------|
| Daytona | 12 | 8  | .388        | 3  | .146             |
| Django  | 15 | 7  | 1           | 6  | .607             |
| Dunni   | 15 | 3  | <b>.035</b> | 1  | <b>.001</b>      |
| Ellis   | 15 | 6  | .607        | 4  | .119             |
| Fiona   | 14 | 8  | .791        | 2  | <b>.013</b>      |
| Franzi  | 14 | 6  | .791        | 4  | .180             |
| Gandalf | 15 | 6  | .607        | 8  | 1                |
| Helena  | 15 | 7  | 1           | 0  | <b>&lt; .001</b> |
| Holly   | 15 | 9  | .607        | 10 | .302             |
| Jazzie  | 15 | 10 | .302        | 3  | <b>.035</b>      |
| Jolie   | 15 | 5  | .302        | 12 | <b>.035</b>      |
| Kiki    | 10 | 8  | .109        | 8  | .109             |
| Lenny   | 15 | 4  | .119        | 6  | .607             |

|         |    |   |      |    |             |
|---------|----|---|------|----|-------------|
| Lilly   | 15 | 7 | 1    | 4  | .119        |
| Lilu    | 15 | 5 | .302 | 10 | .302        |
| Monty   | 15 | 6 | .607 | 9  | .607        |
| Mozart  | 11 | 4 | .549 | 6  | 1           |
| Ozzy    | 15 | 8 | 1    | 14 | <b>.001</b> |
| Ravenna | 15 | 9 | .607 | 4  | .119        |
| Rusty   | 15 | 7 | 1    | 2  | <b>.007</b> |
| Sally   | 14 | 7 | 1    | 10 | .180        |
| Shari   | 12 | 6 | 1    | 6  | 1           |
| Sixtus  | 15 | 9 | .607 | 2  | <b>.007</b> |
| Snoopy1 | 14 | 4 | .180 | 3  | .057        |
| Snoopy2 | 13 | 3 | .092 | 8  | .581        |
| Spaiky  | 14 | 9 | .424 | 9  | .424        |

|        |    |   |      |    |             |
|--------|----|---|------|----|-------------|
| Timo   | 13 | 3 | .092 | 9  | .267        |
| Ultimo | 15 | 9 | .607 | 14 | <b>.001</b> |
| Zazu   | 14 | 3 | .057 | 5  | .424        |

**Supplementary Video 1** Example of the procedure for the baseline and observation phase in the control and eavesdropping conditions. The first clip shows the baseline (single trial). The second clip shows the subject (Django) observing the selfish partner (wearing white) and the generous partner (wearing black) interacting with an invisible dog in the control condition. The third clip shows another subject (Daytona) observing the two partners interacting with the dog demonstrator (Jasper) in the eavesdropping condition

**Supplementary Video 2** Example of the procedure for the direct experience condition. The first clip shows the subject (Django) interacting with the generous partner (wearing black) and the selfish partner (wearing white) in the experience phase. The second clip shows two consecutive trials out of 12 in the test phase

**Supplementary File 1** Full dataset used for statistical analyses

## **Supplementary File 2** Statistical analyses with the exclusion of dogs with a side bias

Fifteen dogs (5 young, 3 adult and 7 senior) that had a side bias were excluded from the following analyses. Thus, this subset comprised 25 dogs (6 young, 12 adult and 7 senior). Since the sample size was reduced and the percentage of excluded dogs in each age group was unbalanced (i.e., a greater percentage of senior dogs (50%) showed a side bias compared to young (18%) and adult (40%) dogs), we did not include age as a predictor and only tested the effect of (1) condition (eavesdropping vs control) and (2) trial number (in the direct experience condition only) in the following analyses.

We conducted four Generalized Linear Mixed-Effects Models (GLMM):

1. A binomial GLMM partner choice after the observation phase in the eavesdropping vs control condition;
2. A beta GLMM predicting proportion of time spent in proximity to the generous partner after the observation phase in the eavesdropping vs control condition;
3. A binomial GLMM predicting partner choice after the experience phase in the direct experience condition;
4. A beta GLMM predicting proportion of time spent in proximity to the generous partner after the experience phase in the direct experience condition.

We evaluated the quality of the models following the same steps as the main analyses. There were no issues with model stability, collinearity, overdispersion or best linear unbiased predictors (BLUPs).



### **1. Results of the binomial GLMM predicting partner choice after the observation phase in the eavesdropping vs control condition**

After discarding the trials in which dogs did not choose either partner (5 trials), the data for this model comprised 45 trials from 24 dogs. At a group level, we found that the full model including condition was not better than the null model lacking condition (full-null model comparison,  $\chi^2 = 0.368$ ,  $df = 1$ ,  $p = .544$ ; Table SI1). Fig. S1 shows that all model estimates and confidence intervals include the chance level of 50%, thus dogs did not choose the generous partner above chance level.

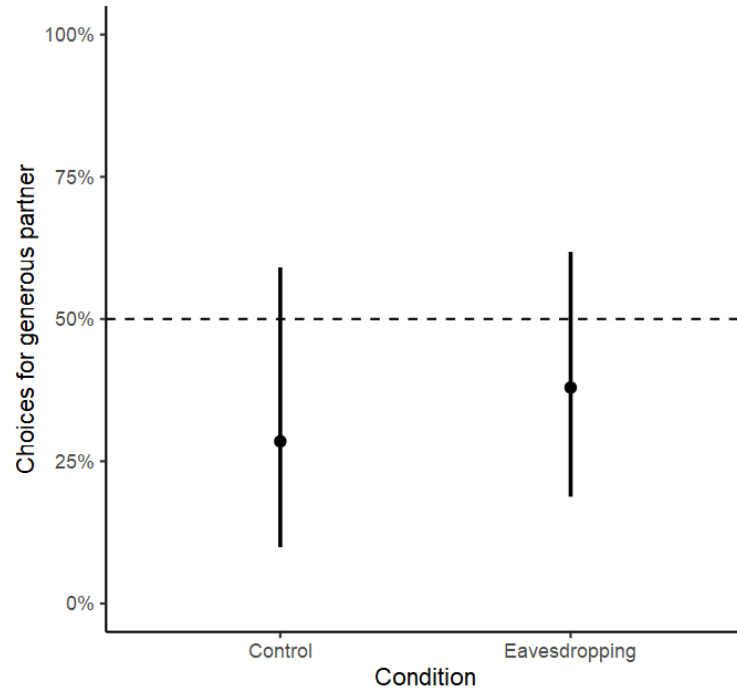

**Fig. S1** Estimates (circles) and confidence intervals (lines) indicating the percentage of choices for the generous partner by condition (model 1).

The horizontal dotted line represents the chance level (50%)

**Table SI1** Results of the binomial GLMM predicting partner choice after the observation phase in the eavesdropping vs control condition

| Term                                       | Estimate | SE    | 95% CI |       | Model stability |        | $\chi^2$ | df | $p^1$ |
|--------------------------------------------|----------|-------|--------|-------|-----------------|--------|----------|----|-------|
|                                            |          |       | Lower  | Upper | Min             | Max    |          |    |       |
| Intercept                                  | -0.920   | 0.657 | -2.333 | 0.306 | -1.222          | -0.646 |          |    |       |
| Condition (Experimental) <sup>2</sup>      | 0.428    | 0.714 | -0.936 | 1.918 | 0.124           | 0.648  | 0.368    | 1  | .544  |
| Trial (Trial 2) <sup>3</sup>               | -0.142   | 0.638 | -1.415 | 1.114 | -0.376          | 0.067  | 0.050    | 1  | .824  |
| z-transformed condition order <sup>4</sup> | -0.901   | 0.328 | -0.738 | 0.562 | -0.262          | -0.006 | 0.076    | 1  | .783  |

<sup>1</sup>The  $p$  value of the intercept is not shown due to its limited interpretation

<sup>2</sup>Reference level for Condition = Control

<sup>3</sup>Reference level for Trial = Trial 1

<sup>4</sup>z-transformed to a mean of 0 and a standard deviation of 1; original mean ( $SD$ ): 1.578 (0.499)

## **2. Results of the beta GLMM predicting proportion of time spent in proximity to the generous partner after the observation phase in the eavesdropping vs control condition**

After discarding trials in which the subject did not spend any time in proximity to either partner (32 trials), the data for this model consisted of 43 trials from 24 dogs. This model was slightly overdispersed (dispersion parameter = 1.236), which can lead to less conservative estimates. The amount of time that dogs spent in proximity to the generous partner was not influenced by condition (full-null model comparison,  $\chi^2 = 0.428$ ,  $df = 1$ ,  $p = .513$ ; Table SI2). Fig. S2 shows that all model estimates and confidence intervals include the chance level of 50%, thus dogs did not spend more time with the generous partner above chance level.

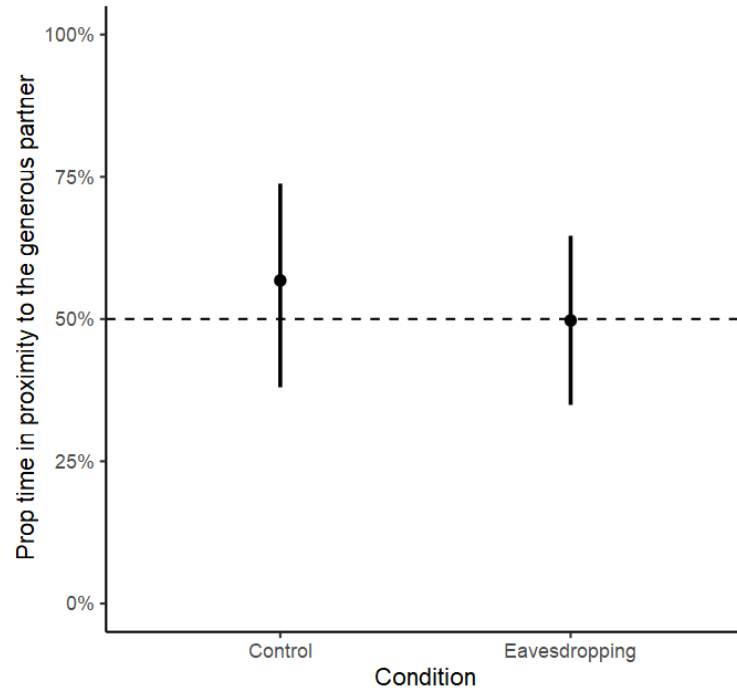

**Fig. S2** Estimates (circles) and confidence intervals (lines) indicating the proportion of time spent in proximity to the generous partner by condition (model 2). The horizontal dotted line represents the chance level (50%)

**Table SI2** Results of the beta GLMM predicting proportion of time spent in proximity to the generous partner after the observation phase in the eavesdropping vs control condition

| Term                                       | Estimate | SE    | 95% CI |       | Model stability |        | $\chi^2$ | df | $p^1$ |
|--------------------------------------------|----------|-------|--------|-------|-----------------|--------|----------|----|-------|
|                                            |          |       | Lower  | Upper | Min             | Max    |          |    |       |
| Intercept                                  | 0.273    | 0.389 | -0.503 | 1.044 | 0.145           | 0.393  |          |    |       |
| Condition (Experimental) <sup>2</sup>      | -0.283   | 0.433 | -1.143 | 0.569 | -0.362          | -0.189 | 0.428    | 1  | .513  |
| Trial (Trial 2) <sup>3</sup>               | 0.317    | 0.398 | -0.469 | 1.101 | 0.184           | 0.506  | 0.633    | 1  | .426  |
| z-transformed condition order <sup>4</sup> | -0.087   | 0.203 | -0.488 | 0.312 | -0.134          | -0.015 | 0.186    | 1  | .666  |

<sup>1</sup>Some  $p$  values are not indicated due to their limited interpretation

<sup>2</sup>Reference level for Condition = Control

<sup>3</sup>Reference level for Trial = Trial 1

<sup>4</sup>z-transformed to a mean of 0 and a standard deviation of 1; original mean ( $SD$ ): 1.581 (0.499)

### **3. Results of the binomial GLMM predicting partner choice after the experience phase in the direct experience condition**

After discarding the trials in which dogs did not choose either partner (29 trials), the data for this model comprised 271 trials from 25 dogs. At a group level, we found that the full model including trial number was not better than the null model lacking this variable (full-null model comparison,  $\chi^2 = 0.668$ ,  $df = 1$ ,  $p = .414$ ; Table SI3). Fig. S3 shows that all model estimates and confidence intervals include the chance level of 50%, thus dogs did not choose the generous partner above chance level.

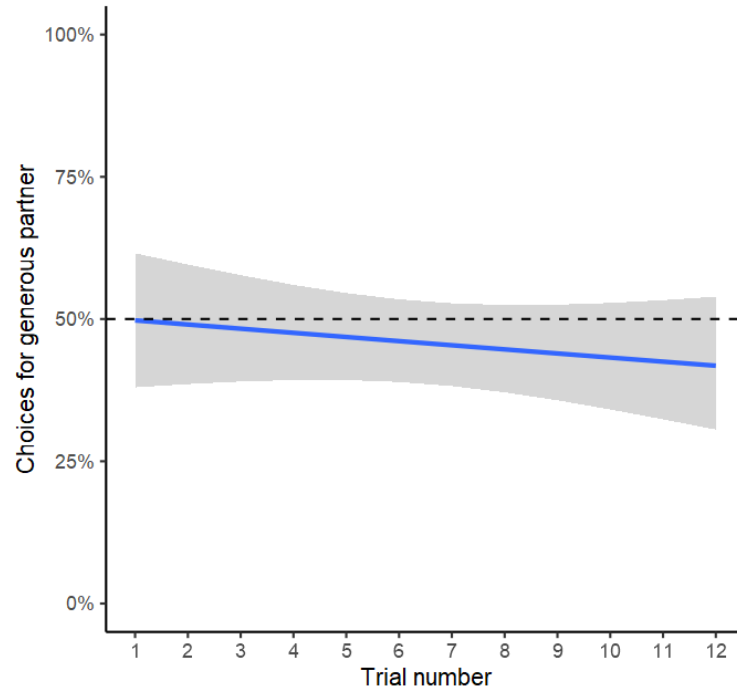

**Fig. S3** Estimates (lines) and confidence intervals (shaded area) indicating the percentage of choices for the generous partner by trial (model 3).

The horizontal dotted line represents the chance level (50%)



**Table SI3** Results of the binomial GLMM predicting partner choice after the experience phase in the direct experience condition

| Term                                       | Estimate | SE    | 95% CI |       | Model stability |        | $\chi^2$ | df | p <sup>1</sup> |
|--------------------------------------------|----------|-------|--------|-------|-----------------|--------|----------|----|----------------|
|                                            |          |       | Lower  | Upper | Min             | Max    |          |    |                |
| Intercept                                  | -0.169   | 0.149 | -0.485 | 0.133 | -0.232          | -0.092 |          |    |                |
| z-transformed trial number <sup>2</sup>    | -0.102   | 0.125 | -0.349 | 0.142 | -0.140          | -0.051 | 0.668    | 1  | .414           |
| z-transformed condition order <sup>3</sup> | 0.001    | 0.149 | -0.309 | 0.311 | -0.064          | 0.068  | 0.000    | 1  | .997           |

<sup>1</sup>The *p* value of the intercept is not shown due to its limited interpretation

<sup>2</sup>z-transformed to a mean of 0 and a standard deviation of 1; original mean (*SD*): 6.454 (3.487)

<sup>3</sup>z-transformed to a mean of 0 and a standard deviation of 1; original mean (*SD*): 1.472 (0.500)

#### **4. Results of the beta GLMM predicting proportion of time spent in proximity after the experience phase in the direct experience condition**

After discarding trials in which the subject did not spend any time in proximity to either partner (69 trials), the data for this model consisted of 231 trials from 25 dogs. The amount of time that dogs spent in proximity to the generous partner was not influenced by trial number (full-null model comparison,  $\chi^2 = 1.289$ ,  $df = 1$ ,  $p = .256$ ; Table SI4). Fig. S4 shows that model estimates and confidence intervals initially include the chance level of 50%, but this is not the case in later trials. This pattern suggests an improvement in dogs' time spent in proximity to the generous partner over the course of the trials. However, the statistical analyses do not support this interpretation, as trial number is not a significant predictor in the model – this indicates that the observed improvement was not robust enough to reach statistical significance.

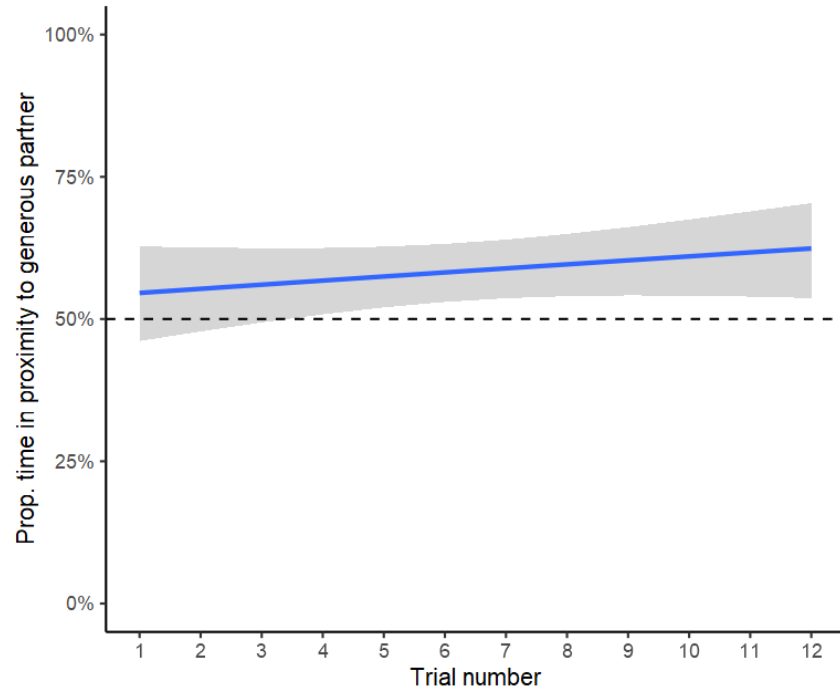

**Fig. S4** Estimates (lines) and confidence intervals (shaded area) indicating the percentage of time spent in proximity to the generous partner by trial (model 4). The horizontal dotted line represents the chance level (50%)

**Table SI4** Results of the beta GLMM predicting proportion of time spent in proximity to the generous partner after the experience phase in the direct experience condition

| Term                                       | Estimate | SE    | 95% CI |       | Model stability |       | $\chi^2$ | df | $p^1$ |
|--------------------------------------------|----------|-------|--------|-------|-----------------|-------|----------|----|-------|
|                                            |          |       | Lower  | Upper | Min             | Max   |          |    |       |
| Intercept                                  | 0.338    | 0.107 | 0.127  | 0.564 | 0.289           | 0.383 |          |    |       |
| z-transformed trial number <sup>2</sup>    | 0.101    | 0.089 | -0.074 | 0.276 | 0.074           | 0.124 | 1.289    | 1  | .256  |
| z-transformed condition order <sup>3</sup> | 0.209    | 0.106 | -0.004 | 0.428 | 0.163           | 0.255 | 3.700    | 1  | .054  |

<sup>1</sup>The  $p$  value of the intercept is not shown due to its limited interpretation

<sup>2</sup>z-transformed to a mean of 0 and a standard deviation of 1; original mean ( $SD$ ): 6.264 (3.447)

<sup>3</sup>z-transformed to a mean of 0 and a standard deviation of 1; original mean ( $SD$ ): 1.450 (0.499)
